# Supplementary material for: Aromaticity of strongly bent benzene rings: persistence of a diatropic ring current and its shielding cone in [5]paracyclophane
Source: Royal Society of Chemistry journal article supplement (doi:10.1039/c1cp21950b), 2011-01-01

## Electronic Supplementary Information (ESI)

for

### Aromaticity of strongly bent benzene rings: persistence of a diatropic ring current and its shielding cone in [5]paracyclophane†

Leonardus W. Jenneskens,<sup>\*a</sup> Remco W.A. Havenith,<sup>b</sup> Alessandro Soncini<sup>c</sup> and Patrick W. Fowler<sup>\*d</sup>

<sup>a</sup> *Organic Chemistry & Catalysis, Debye Institute for Nanomaterials Science, Utrecht University, Universiteitsweg 99, 3584 CG Utrecht, Netherlands. Fax: +31-30-2523615; Tel: +31-30-2533128; E-mail: [l.w.jenneskens@uu.nl](mailto:l.w.jenneskens@uu.nl)*

<sup>b</sup> *Theoretical Chemistry, Zernike Institute for Advanced Materials, University of Groningen, Nijenborgh 4, 9747 AG Groningen, Netherlands. E-mail: [r.w.a.havenith@rug.nl](mailto:r.w.a.havenith@rug.nl)*

<sup>c</sup> *School of Chemistry University of Melbourne, Victoria 3010, Australia. E-mail: [asoncini@unimelb.edu.au](mailto:asoncini@unimelb.edu.au)*

<sup>d</sup> *Department of Chemistry, University of Sheffield, Sheffield S3 7HF United Kingdom. E-mail: [P.W.Fowler@sheffield.ac.uk](mailto:P.W.Fowler@sheffield.ac.uk)*

**Table S1.** RHF/6-31G\*\* cartesian coordinates (in a.u.) for [5]paracyclophane (**1**,  $C_s$  symmetry).<sup>a,b</sup>

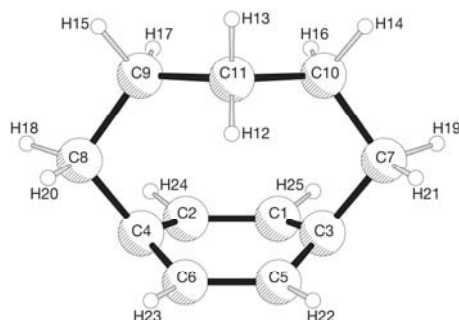

| Atom | x          | y          | Z          |
|------|------------|------------|------------|
| C1   | 1.2957189  | 2.2875915  | -2.2223141 |
| C2   | -1.2957189 | 2.2875915  | -2.2223141 |
| C3   | 2.5592490  | 0.0038648  | -1.7631529 |
| C4   | -2.5592490 | 0.0038648  | -1.7631529 |
| C5   | 1.3165327  | -2.2026540 | -2.3866116 |
| C6   | -1.3165327 | -2.2026540 | -2.3866116 |
| C7   | 4.2945874  | -0.0797691 | 0.4925069  |
| C8   | -4.2945874 | -0.0797691 | 0.4925069  |
| C9   | -2.5877435 | 0.4693392  | 2.8753773  |
| C10  | 2.5877435  | 0.4693392  | 2.8753773  |
| C11  | 0.0000000  | -0.9475084 | 3.3172195  |
| H12  | 0.0000000  | -2.7574002 | 2.3631237  |
| H13  | 0.0000000  | -1.4018318 | 5.3179054  |
| H14  | 3.7639727  | 0.0836611  | 4.5163972  |
| H15  | -3.7639727 | 0.0836611  | 4.5163972  |
| H16  | 2.2274896  | 2.4893183  | 2.9114415  |
| H17  | -2.2274896 | 2.4893183  | 2.9114415  |
| H18  | -5.7854776 | 1.3335284  | 0.4639859  |
| H19  | 5.7854776  | 1.3335284  | 0.4639859  |
| H20  | -5.1848625 | -1.9205230 | 0.6697054  |
| H21  | 5.1848625  | -1.9205230 | 0.6697054  |
| H22  | 2.2850914  | -3.9880089 | -2.2563028 |
| H23  | -2.2850914 | -3.9880089 | -2.2563028 |
| H24  | -2.2969218 | 4.0539304  | -2.0722341 |
| H25  | 2.2969218  | 4.0539304  | -2.0722341 |

<sup>a</sup> In this orientation, the  $z$ -axis is almost perpendicular to the  $C_1$ - $C_2$ - $C_5$ - $C_6$  (benzenoid)-plane (see also Fig. 1). The reference plane for the current-density calculations is parallel to  $xy$ , at  $z = -2.30446285$  a.u.

<sup>b</sup> RHF/6-31G\*\* total energy: -424.621597 a.u.. The Hessian gives no imaginary frequencies.

**Table S2.** RHF/6-31G\*\* cartesian coordinates (in a.u.) for 1,4-pentamethylene Dewar benzene (**2**,  $C_s$  symmetry).<sup>a,b</sup>

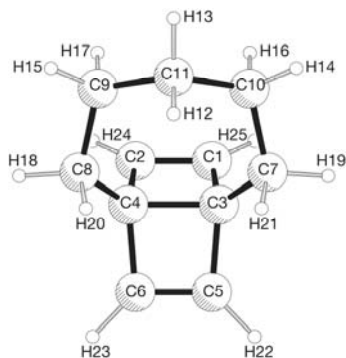

| Atom | x          | y          | Z          |
|------|------------|------------|------------|
| C1   | -2.8146390 | 1.2485978  | -2.0283481 |
| C2   | -2.8146390 | -1.2485978 | -2.0283481 |
| C3   | 0.0176937  | 1.4796811  | -1.5020207 |
| C4   | 0.0176937  | -1.4796811 | -1.5020207 |
| C5   | 1.7092504  | 1.2480866  | -3.8350164 |
| C6   | 1.7092504  | -1.2480866 | -3.8350164 |
| C7   | 0.9391716  | 3.0711120  | 0.7049794  |
| C8   | 0.9391716  | -3.0711120 | 0.7049794  |
| C9   | -0.2868389 | -2.4775493 | 3.2620830  |
| C10  | -0.2868389 | 2.4775493  | 3.2620830  |
| C11  | 0.5599069  | 0.0000000  | 4.5103372  |
| H12  | 2.6127988  | 0.0000000  | 4.6730379  |
| H13  | -0.1582350 | 0.0000000  | 6.4369156  |
| H14  | 0.1808326  | 4.0084643  | 4.5520212  |
| H15  | 0.1808326  | -4.0084643 | 4.5520212  |
| H16  | -2.3333071 | 2.4911414  | 3.0772951  |
| H17  | -2.3333071 | -2.4911414 | 3.0772951  |
| H18  | 0.5999844  | -5.0492097 | 0.2449845  |
| H19  | 0.5999844  | 5.0492097  | 0.2449845  |
| H20  | 2.9789694  | -2.8688999 | 0.8712550  |
| H21  | 2.9789694  | 2.8688999  | 0.8712550  |
| H22  | 2.5297992  | 2.6477014  | -5.0605951 |
| H23  | 2.5297992  | -2.6477014 | -5.0605951 |
| H24  | -4.2511077 | -2.6443303 | -2.3810120 |
| H25  | -4.2511077 | 2.6443303  | -2.3810120 |

<sup>a</sup> In this orientation, the z-axis is almost perpendicular to the C<sub>1</sub>-C<sub>2</sub>-C<sub>5</sub>-C<sub>6</sub> plane (see also Fig. S1).

<sup>b</sup> RHF/6-31G\*\* total energy: -424.603570 a.u.. The Hessian gives no imaginary frequencies.

**Fig. S1.** RHF/6-31G\*\* optimised carbon-carbon bond lengths (in Å) of [5]paracyclophane (**1**,  $C_s$  symmetry) and its valence isomer 1,4-pentamethylene Dewar benzene (**2**,  $C_s$  symmetry).

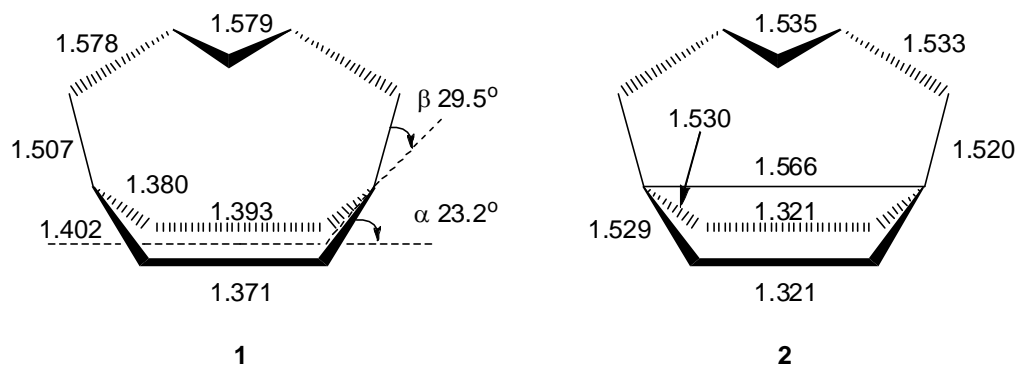

**Fig. S2.** CTOCD-DZ/6-31G\*\*//RHF/6-31G\*\*  $\pi$  current-density maps for the 1,4-pentamethylene Dewar benzene (**2**, see also Ref. 14 of the paper). Plotting planes (a), (b) and (c) are defined in the diagram – (a) and (b) are planes parallel to the respective halves of the bent Dewar benzene ring at  $1a_0$  below the plane of carbon nuclei, and (c) is at  $1a_0$  below the four olefinic carbon nuclei of the bent Dewar benzene ring.

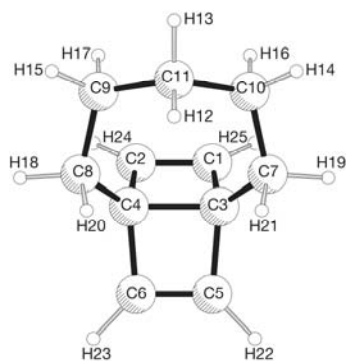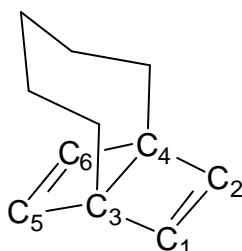

(a) plane a: parallel and  $1 a_0$  below the plane containing C3, C4, C5 and C6

(b) plane b: parallel and  $1 a_0$  below the plane containing C1, C2, C3 and C4

(c) plane c: parallel and  $1 a_0$  below the plane containing C1, C2, C5 and C6

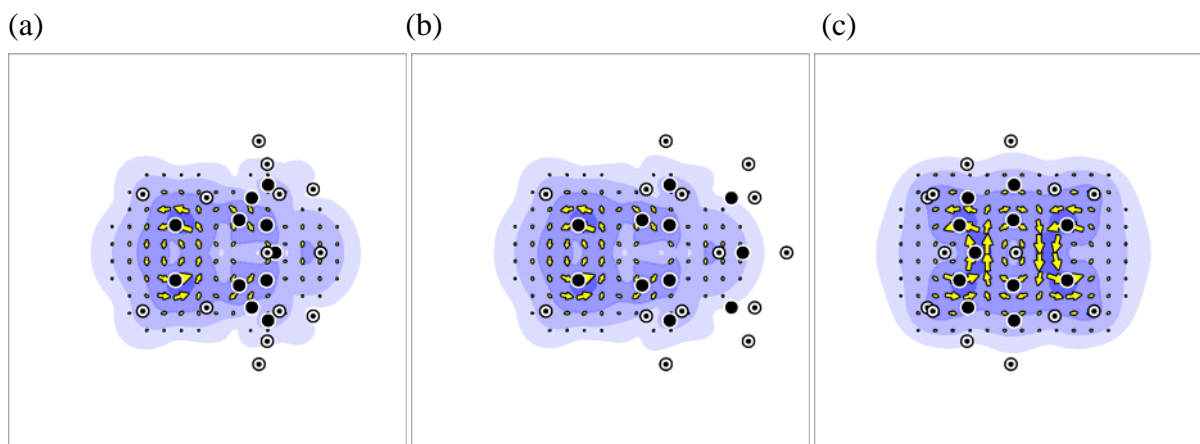

Supplement: c1cp21950b.pdf [file c1cp21950b.pdf]
